# Supplementary material for: Sensitivity of Clarireedia spp. to benzimidazoles and dimethyl inhibitors fungicides and efficacy of biofungicides on dollar spot of warm season turfgrass
Source: Front Plant Sci. 2023 Jun 9;14:1155670. doi: 10.3389/fpls.2023.1155670 (PMC10288879; doi:10.3389/fpls.2023.1155670)
Supplement: Supplementary file 2 [file Table_1.xlsx]

## Sheet: Table S1
Table S1: Bio- and synthetic fungicides, their active ingredients (a.i.), fungicide resistance action committee (FRAC) group, code, product rate, and manufacturer
Bio/synthetic fungicide	Active ingredient	FRAC group	FRAC code	Label rate per 1000 sq ft	Manufacturer
Rhapsody	Bacillus subtilis QST713	Biocontrol agent	Unspecified	10.0 fl oz	Bayer
Stargus	Bacillus amyloliquefaciens F727	Biocontrol agent	BM	1.0 fl oz	Marrone Bio Innovations
Regalia	Plant extract of Reynoutria sachalinensis	Plant extract	P5	1.5 fl oz	Marrone Bio Innovations
Heritage	Azoxystrobin	Quinone outside inhibitor (QoI)	11	0.4 oz	Syngenta
Medallion	Fludioxonil	Phenylpyrrole (PP)	12	2.0 fl oz	Syngenta
Xzemplar	Fluxapyroxad	Succinate dehydrogenase inhibitor (SDHI)	7	0.21 fl oz	BASF
Velista	Penthiopyrad	Succinate dehydrogenase inhibitor (SDHI)	7	0.5 oz	Syngenta
Banner Maxx	Propiconazole	Demethylation inhibitor (DMI)	3	2.0 fl oz	Syngenta
Emerald	Boscalid	Succinate dehydrogenase inhibitor (SDHI)	7	0.18 oz	BASF
These fungicides were used in the efficacy assays to control dollar spot caused by C. monteithiana in vitro, in the growth chamber, and field environments.

## Sheet: Table S2
Table S2: Percent mycelial growth inhibition of C. monteithiana DS8 on in vitro assay experiments of treatment alone as well as in combination compared to the non-treated control
Fungicide treatment	Dose/gallon water used (fl oz)	% mycelial growth inhibition
		Experiment 1	Experiment 2
A. Treatment alone
Propiconazole	2.00 fl oz	100.0±0.0D	100.0±0.0B
Bacillus subtilis QST713	10.00 fl oz	100.0±0.0D	100.0±0.0B
Bacillus amyloliquefaciens F727	1.00 fl oz	100.0±0.0D	100.0±0.0B
Fludioxonil	2.00 fl oz	100.0±0.0D	89.9±6.8B
Boscalid	0.18 oz	62.6±1.7C	30.5±8.6A
Penthiopyrad	0.50 oz	61.6±0.7C	24.4±8.0A
Fluxapyroxad	0.21 fl oz	39.0±1.6B	23.9±9.0A
Azoxystrobin	0.40 fl oz	8.8±1.5A	15.4±7.6A
Reynoutria sachalinensis extr.	1.50 fl oz	6.7±2.2A	8.8±4.5A
B. Treatment in combination
100% Propiconazole	2.00 fl oz Prop	100.0±0.0B	100.0±0.0C
100% Bacillus subtilis QST713	10.00 fl oz BS	100.0±0.0B	100.0±0.0C
25% Bacillus subtilis QST713 + 75% Propiconazole	2.50 fl oz Bs + 1.50 fl oz Prop	100.0±0.0B	100.0±0.0C
25% Reynoutria sachalinensis extr. + 75% Propiconazole	0.375 fl oz Rs + 1.50 fl oz Prop	100.0±0.0B	100.0±0.0C
50% Bacillus subtilis QST713 + 50% Propiconazole	5.00 fl oz Bs + 1.00 fl oz Prop	100.0±0.0B	100.0±0.0C
50% Reynoutria sachalinensis extr. + 50% Propiconazole	0.75 fl oz Rs + 1.00 fl oz Prop	100.0±0.0B	100.0±0.0C
75% Reynoutria sachalinensis extr. + 25% Propiconazole	1.125 fl oz Rs + 0.50 fl oz Prop	100.0±0.0B	100.0±0.0C
75% Bacillus subtilis QST713 + 25% Propiconazole	7.50 fl oz Bs + 0.50 fl oz Rs	95.8±2.8B	100.0±0.0C
50% Bacillus subtilis QST713 + 50% Reynoutria sachalinensis extr.	5.00 fl oz Prop + 0.75 fl oz Rs	88.6±1.9B	65.0±4.3B
100% Reynoutria sachalinensis extr.	1.50 fl oz Rs	21.7±7.4A	37.9±1.7A
Prop = Propiconazole; Bs = Bacillus subtilis QST713; Rs = Reynoutria sachalinensis extr.
Petri-plates under in vitro assay were incubated in PDA media for 4 days in 12-hour photoperiod at 25°C
Mean values within each variable with the same letters are not significantly different according to Tukey’s test (P<0.05)

## Sheet: Table S3
Table S3: Disease severity (%) (A) and area under the disease progress curve (AUDPC) (B and C) for the seven spray programs (T1-T7) across seven time points (0-42 days) and two growth chamber experiments carried out at the UGA Griffin campus, Griffin, GA in 2022.
	Experiment 1	2022-11-07	2022-11-14	2022-11-21	2022-11-28	2022-12-05	2022-12-12	2022-12-19
	Experiment 2	2022-11-11	2022-11-18	2022-11-25	2022-12-02	2022-12-09	2022-12-16	2022-12-23
Treatment ID	Treatment details	0 dayns	7 daysns	14 days**	21 daysns	28 daysns	35 days*	42 daysns	Mean	%percent reduction based on NTC
A. Disease severity (%) (Combined)
T1	Non-treated control (NTC)	34.0±10.6	38.7±10.6	55.8±12.6	36.7±8.9	19.6±9.0	19.6±7.2	7.6±1.8	30.3±3.9B
T2	B. subtilis QST713 applied every 7 days	33.0±9.2	30.9±10.9	38.7±9.4	20.1±7.2	8.8±2.4	5.3±1.2	4.1±0.9	20.1±3.1AB	33.6634
T3	B. subtilis QST713 applied every 14 days	19.0±9.0	17.5±10.5	26.0±9.9	15.5±7.1	7.6±1.9	6.8±1.0	4.7±0.8	13.9±2.7AB	54.1254
T4	propiconazole applied every 28 days	19.9±5.4	28.5±8.8	35.0±12.1	33.1±12.6	9.1±2.3	11.7±4.1	6.8±1.0	20.6±3.2AB	32.0132
T5	tank mix of 75% B. subtilis QST713 + 25% propiconazole applied every 28 days	21.3±6.9	26.2±8.8	16.4±4.8	19.6±5.5	8.2±1.7	5.6±0.9	3.8±0.4	14.5±2.1AB	52.1452
T6	75% B. subtilis QST713 + 25% propiconazole tank mix in rotation with 100% B. subtilis QST713 applied every 14 days	22.5±6.7	15.3±3.8	34.0±9.0	24.8±6.9	17.0±3.5	9.4±2.2	11.4±4.1	19.2±2.3AB	36.6337
T7	100% B. subtilis QST713 in rotation with 75% B. subtilis QST713 + 25% propiconazole tank mix applied every 14 days	10.0±2.1	9.4±2.2	12.3±4.0	11.7±4.1	5.9±1.1	7.0±1.9	4.4±0.8	8.7±1.0A	71.2871
Mean		22.8±2.9	23.8±3.3	31.2±3.8	23.1±3.0	10.9±1.6	9.3±1.4	6.1±0.7
B. Area under the disease progress curve (AUDPC) (Experiment 1)
T1	Non-treated control (NTC)								2064.4±397.0B
T2	B. subtilis QST713 applied every 7 days								1170.9±248.0AB	43.2813
T3	B. subtilis QST713 applied every 14 days								844.1±455.8AB	59.1116
T4	propiconazole applied every 28 days								1526.4±317.1AB	26.0608
T5	tank mix of 75% B. subtilis QST713 + 25% propiconazole applied every 28 days								586.4±117.9A	71.5947
T6	75% B. subtilis QST713 + 25% propiconazole tank mix in rotation with 100% B. subtilis QST713 applied every 14 days								912.5±208.9AB	55.7983
T7	100% B. subtilis QST713 in rotation with 75% B. subtilis QST713 + 25% propiconazole tank mix applied every 14 days								410.0±98.6A	80.1395
Mean									1073.53
C. Area under the disease progress curve (AUDPC) (Experiment 2)
T1	Non-treated control (NTC)								609.6±188.3A
T2	B. subtilis QST713 applied every 7 days								540.5±218.0A	11.3353
T3	B. subtilis QST713 applied every 14 days								346.4±99.5A	43.1759
T4	propiconazole applied every 28 days								303.3±57.0A	50.2461
T5	tank mix of 75% B. subtilis QST713 + 25% propiconazole applied every 28 days								652.6±233.6A	-7.05381
T6	75% B. subtilis QST713 + 25% propiconazole tank mix in rotation with 100% B. subtilis QST713 applied every 14 days								729.9±219.1A	-19.7343
T7	100% B. subtilis QST713 in rotation with 75% B. subtilis QST713 + 25% propiconazole tank mix applied every 14 days								338.2±75.3A	44.521
Mean									502.9
Mean values within each variable with the same letters are not significantly different according to Tukey’s test (P<0.05)

## Sheet: Table S4
Table S4: Disease severity (%) (A), turf quality (1-9) (B), and area under the disease progress curve (AUDPC) (C) for the seven spray programs (T1-T7) and the seven time points (0-42 days) in the field experiments across both summer and fall seasons in 2022.
1) Combined
	Summer season experiment	2022-06-09	2022-06-16	2022-06-23	2022-06-30	2022-07-07	2022-07-14	2022-07-21
	Fall season experiment	2022-09-26	2022-10-03	2022-10-10	2022-10-17	2022-10-24	2022-10-31	2022-11-07
Treatment ID	Treatment details	0 day*	7 daysns	14 daysns	21 days*	28 days**	35 days***	42 days***	Mean	%percent reduction based on NTC
A. Disease severity (%)
T1	Non-treated control (NTC)	12.9±2.3	15.8±3.6	21.3±6.9	28.5±9.9	28.5±10.3	45.3±8.8	45.3±10.8	28.2±3.3B	-
T2	B. subtilis QST713 applied every 7 days	7.3±1.0	11.1±2.3	7.9±1.8	8.2±1.7	5.0±1.0	4.1±0.9	5.3±2.2	7.0±0.7A	75.253
T3	B. subtilis QST713 applied every 14 days	13.2±4.1	17.2±6.8	21.3±6.9	16.3±7.0	10.0±4.1	10.0±4.1	7.6±1.9	13.7±2.0A	51.6194
T4	propiconazole applied every 28 days	9.4±1.5	12.3±2.0	12.3±2.5	5.9±0.8	4.7±0.8	7.0±2.1	5.0±1.0	8.1±0.7A	71.3563
T5	tank mix of 75% B. subtilis QST713 + 25% propiconazole applied every 28 days	8.2±1.9	8.8±1.6	8.2±0.8	9.4±2.2	5.9±1.1	7.0±1.9	4.7±0.8	7.5±0.6A	73.583
T6	75% B. subtilis QST713 + 25% propiconazole tank mix in rotation with 100% B. subtilis QST713 applied every 14 days	7.9±1.8	11.1±2.3	8.5±1.8	5.9±0.8	5.9±0.8	5.0±0.7	4.4±0.9	7.0±0.6A	75.3543
T7	100% B. subtilis QST713 in rotation with 75% B. subtilis QST713 + 25% propiconazole tank mix applied every 14 days	14.6±2.1	19.3±4.4	15.2±3.8	8.2±1.7	5.9±0.8	5.3±1.0	5.9±1.9	10.6±1.2A	62.3482
Mean		10.5±0.9	13.7±1.4	13.5±1.7	11.8±2.0	9.4±1.9	12.0±2.3	11.2±2.4
Treatment ID	Treatment details	0 dayns	7 daysns	14 daysns	21 days**	28 days***	35 days***	42 days***	Mean
B. Turf quality (1-9)
T1	Non-treated control (NTC)	5.5±0.42	5.8±0.46	5.8±0.51	5.3±0.61	5.6±0.45	3.9±0.41	4.7±0.71	5.2±0.20A
T2	B. subtilis QST713 applied every 7 days	5.8±0.33	6.6±0.26	6.9±0.40	7.1±0.37	7.9±0.31	7.7±0.25	7.9±0.37	7.1±0.15B
T3	B. subtilis QST713 applied every 14 days	5.6±0.62	5.8±0.53	5.9±0.56	6.4±0.69	6.8±0.50	6.6±0.55	7.1±0.32	6.3±0.21B
T4	propiconazole applied every 28 days	5.6±0.38	5.8±0.35	6.1±0.18	7.4±0.31	7.7±0.19	7.5±0.35	7.6±0.33	6.8±0.16B
T5	tank mix of 75% B. subtilis QST713 + 25% propiconazole applied every 28 days	6.1±0.45	6.6±0.27	6.3±0.27	6.8±0.31	7.4±0.29	7.3±0.30	7.8±0.30	6.9±0.14B
T6	75% B. subtilis QST713 + 25% propiconazole tank mix in rotation with 100% B. subtilis QST713 applied every 14 days	5.9±0.45	6.6±0.34	6.6±0.39	7.6±0.21	7.4±0.18	7.4±0.25	7.8±0.25	7.0±0.14B
T7	100% B. subtilis QST713 in rotation with 75% B. subtilis QST713 + 25% propiconazole tank mix applied every 14 days	5.1±0.35	5.6±0.43	6.0±0.40	7.0±0.30	7.0±0.21	7.2±0.28	7.8±0.31	6.5±0.17B
Mean		5.7±0.16	6.1±0.15	6.2±0.15	6.8±0.18	7.1±0.15	6.8±0.21	7.2±0.20
C. Area under the disease progress curve (AUDPC)
T1	Non-treated control (NTC)								1179.8±246.7B
T2	B. subtilis QST713 applied every 7 days								298.2±40.4A	74.7245
T3	B. subtilis QST713 applied every 14 days								595.6±216.5AB	49.5169
T4	propiconazole applied every 28 days								345.4±44.5A	70.7239
T5	tank mix of 75% B. subtilis QST713 + 25% propiconazole applied every 28 days								319.7±35.0A	72.9022
T6	75% B. subtilis QST713 + 25% propiconazole tank mix in rotation with 100% B. subtilis QST713 applied every 14 days								297.1±42.3A	74.8178
T7	100% B. subtilis QST713 in rotation with 75% B. subtilis QST713 + 25% propiconazole tank mix applied every 14 days								448.9±72.0A	61.9512
Mean									497.8
Mean values within each variable with the same letters are not significantly different according to Tukey’s test (P<0.05)
2) Summer 2022
	Summer season experiment	2022-06-09	2022-06-16	2022-06-23	2022-06-30	2022-07-07	2022-07-14	2022-07-21
Treatment ID	Treatment details	0 day	7 days	14 days	21 days	28 days	35 days	42 days	Mean	%percent reduction based on NTC
A. Disease severity (%)
T1	Non-treated control (NTC)	18.75	23.4375	30.8575	30.8575	21.48	34.375	42.9675	28.9607	-
T2	B. subtilis QST713 applied every 7 days	9.37	16.405	10.5425	9.37	4.6825	2.925	3.5125	8.11536	72.016
T3	B. subtilis QST713 applied every 14 days	21.0925	26.17	28.5125	26.17	14.645	14.645	9.9575	20.1704	30.447
T4	propiconazole applied every 28 days	9.37	14.06	8.1975	5.8525	3.51	2.34	2.925	6.60786	77.2143
T5	tank mix of 75% B. subtilis QST713 + 25% propiconazole applied every 28 days	11.715	11.715	8.1975	9.37	5.2675	4.6825	3.51	7.77964	73.1736
T6	75% B. subtilis QST713 + 25% propiconazole tank mix in rotation with 100% B. subtilis QST713 applied every 14 days	10.5425	15.2325	8.785	7.025	5.8525	5.2675	4.0975	8.11464	72.0185
T7	100% B. subtilis QST713 in rotation with 75% B. subtilis QST713 + 25% propiconazole tank mix applied every 14 days	18.75	28.125	19.92	10.5425	5.8525	4.6825	3.51	13.0546	54.984
Mean		14.2271	19.3064	16.4304	14.1696	8.75571	9.84536	10.0686
Treatment ID	Treatment details	0 day	7 days	14 days	21 days	28 days	35 days	42 days	Mean
B. Turf quality (1-9)
T1	Non-treated control (NTC)	4.5	4.75	5	5	5.625	3.625	4.75	4.75
T2	B. subtilis QST713 applied every 7 days	5.25	6.125	6.125	6.625	7.625	8	8.375	6.875
T3	B. subtilis QST713 applied every 14 days	4.25	5	5.5	5.125	6	6	7	5.55357
T4	propiconazole applied every 28 days	5	5.375	5.75	7.375	7.875	8.375	8.125	6.83929
T5	tank mix of 75% B. subtilis QST713 + 25% propiconazole applied every 28 days	5.25	6.25	5.875	6.375	7.25	7.625	8.25	6.69643
T6	75% B. subtilis QST713 + 25% propiconazole tank mix in rotation with 100% B. subtilis QST713 applied every 14 days	5	6.375	6.25	7.25	7.125	7.75	8.25	6.85714
T7	100% B. subtilis QST713 in rotation with 75% B. subtilis QST713 + 25% propiconazole tank mix applied every 14 days	4.25	4.625	5.25	6.5	6.75	7.5	8.25	6.16071
Mean		4.78571	5.5	5.67857	6.32143	6.89286	6.98214	7.57143
C. Area under the disease progress curve (AUDPC)
T1	Non-treated control (NTC)								1203.06
T2	B. subtilis QST713 applied every 7 days								352.564	70.6954
T3	B. subtilis QST713 applied every 14 days								879.673	26.8828
T4	propiconazole applied every 28 days								280.752	76.6642
T5	tank mix of 75% B. subtilis QST713 + 25% propiconazole applied every 28 days								327.915	72.7442
T6	75% B. subtilis QST713 + 25% propiconazole tank mix in rotation with 100% B. subtilis QST713 applied every 14 days								346.378	71.2096
T7	100% B. subtilis QST713 in rotation with 75% B. subtilis QST713 + 25% propiconazole tank mix applied every 14 days								561.767	53.3067
Mean									564.587
3) Fall 2022
	Fall season experiment	2022-09-26	2022-10-03	2022-10-10	2022-10-17	2022-10-24	2022-10-31	2022-11-07
Treatment ID	Treatment details	0 day	7 days	14 days	21 days	28 days	35 days	42 days	Mean	%percent reduction based on NTC
A. Disease severity (%)
T1	Non-treated control (NTC)	7.025	8.1975	11.715	26.17	35.545	56.25	47.655	27.5082	-
T2	B. subtilis QST713 applied every 7 days	5.2675	5.8525	5.2675	7.025	5.2675	5.2675	7.0275	5.85357	78.7143
T3	B. subtilis QST713 applied every 14 days	5.2675	8.1975	14.06	6.44	5.2675	5.2675	5.2675	7.10964	74.1468
T4	propiconazole applied every 28 days	9.37	10.5425	16.405	5.8525	5.8525	11.715	7.025	9.5375	65.3182
T5	tank mix of 75% B. subtilis QST713 + 25% propiconazole applied every 28 days	4.6825	5.8525	8.1975	9.37	6.44	9.37	5.8525	7.10929	74.1481
T6	75% B. subtilis QST713 + 25% propiconazole tank mix in rotation with 100% B. subtilis QST713 applied every 14 days	5.2675	7.025	8.1975	4.68	5.8525	4.68	4.68	5.76893	79.0221
T7	100% B. subtilis QST713 in rotation with 75% B. subtilis QST713 + 25% propiconazole tank mix applied every 14 days	10.5425	10.5425	10.5425	5.8525	5.8525	5.8525	8.1975	8.1975	70.1909
Mean		6.77464	8.03	10.6264	9.34143	10.0111	14.0575	12.2436
Treatment ID	Treatment details	0 day	7 days	14 days	21 days	28 days	35 days	42 days	Mean
B. Turf quality (1-9)
T1	Non-treated control (NTC)	6.5	6.875	6.5	5.625	5.5	4.25	4.625	5.69643
T2	B. subtilis QST713 applied every 7 days	6.375	7	7.625	7.5	8.25	7.375	7.5	7.375
T3	B. subtilis QST713 applied every 14 days	7	6.5	6.375	7.625	7.5	7.25	7.25	7.07143
T4	propiconazole applied every 28 days	6.25	6.25	6.375	7.5	7.5	6.625	7	6.78571
T5	tank mix of 75% B. subtilis QST713 + 25% propiconazole applied every 28 days	7	6.875	6.75	7.25	7.625	6.875	7.25	7.08929
T6	75% B. subtilis QST713 + 25% propiconazole tank mix in rotation with 100% B. subtilis QST713 applied every 14 days	6.875	6.875	7	8	7.625	7	7.25	7.23214
T7	100% B. subtilis QST713 in rotation with 75% B. subtilis QST713 + 25% propiconazole tank mix applied every 14 days	5.875	6.625	6.75	7.5	7.25	6.875	7.25	6.875
Mean		6.55357	6.71429	6.76786	7.28571	7.32143	6.60714	6.875
C. Area under the disease progress curve (AUDPC)
T1	Non-treated control (NTC)								1156.52
T2	B. subtilis QST713 applied every 7 days								243.792	78.9198
T3	B. subtilis QST713 applied every 14 days								311.5	73.0653
T4	propiconazole applied every 28 days								409.955	64.5521
T5	tank mix of 75% B. subtilis QST713 + 25% propiconazole applied every 28 days								311.483	73.0668
T6	75% B. subtilis QST713 + 25% propiconazole tank mix in rotation with 100% B. subtilis QST713 applied every 14 days								247.861	78.568
T7	100% B. subtilis QST713 in rotation with 75% B. subtilis QST713 + 25% propiconazole tank mix applied every 14 days								336.088	70.9393
Mean									431.029

## Sheet: Table S5
Table S5: Analysis of variance of in vitro mycelial growth of C. monteithiana DS8 combined across two experiments (A & D, respectively) as well as under separate analyses (B-C & E-F, respectively)
Source of variation	df	MS	F value	Pvalue	Significance level
A. Treatment alone (Combined)
Experiment	1	2049	20.806	2.04e-05	***
Treatment	8	15415	156.557	< 2.00E-16	***
Experiment × Treatment	8	617	6.271	3.86e-06	***
Residuals	72	98
B. Treatment alone (Exp1)
Treatment	8	7593	1045	< 2.00E-16	***
Residuals	36	7
C. Treatment alone (Exp2)
Treatment	8	8440	44.5	< 2.00E-16	***
Residuals	36	190
D. Treatment in combination (Combined)
Experiment	1	3	0.115	0.735
Treatment	9	5069	231.491	< 2.00E-16	***
Experiment × Treatment	9	232	10.585	1.27e-10	***
Residuals	80	22
E. Treatment in combination (Exp1)
Treatment	9	3001.4	90.53	< 2.00E-16	***
Residuals	40	33.2
F. Treatment in combination (Exp2)
Treatment	9	2299.5	216	< 2.00E-16	***
Residuals	40	10.6
Two in vitro experiments were carried out: with treatment alone and treatment in combination
Petri-plates under in vitro assay were incubated in PDA media for 4 days in 12-hour photoperiod at 25°C

## Sheet: Table S6
Table S6: Analysis of variance of disease severity (%) (A) and area under the disease progress curve (AUDPC) (B and C) for seven spray programs across seven time points and two growth chamber experiments carried out at the UGA Griffin campus, Griffin, GA in 2022.
Source of variation	df	F value	Pvalue	Significance level
A. Disease severity (%) (Combined)
Experiment	1	9.888	0.0515
Spray program	6	2.802	0.0419	*
Time	6	25.72	6.69e-08	***
Experiment × Spray program	6	3.574	0.0165	*
Experiment × Time	6	8.499	0.00018	***
Spray program × Time	36	1.47	0.0669
Experiment × Spray program × Time	36	1.348	0.122
B. Area under the disease progress curve (AUDPC) (Experiment 1)
Spray program	6	3.434	0.0194	*
C. Area under the disease progress curve (AUDPC) (Experiment 2)
Spray program	6	1.671	0.18547

## Sheet: Table S7
Table S7: Analysis of variance of disease severity (%) (A), turf quality (B), and area under the disease progress curve (AUDPC) (C) for seven spray programs against dollar spot across two seasons and seven time points in the field experiments
Source of variation	df	F value	Pvalue	Significance level
A. Disease severity (%)
Season	1	0.426	0.561
Spray program	6	13.91	6.76e-06	***
Time	6	2.512	0.061
Season × Spray program	6	0.669	0.676
Season × Time	6	4.503	0.006	**
Spray program × Time	36	9.582	2.66e-20	***
Season × Spray program × Time	36	0.759	0.827
B. Turf quality (1-9)
Season	1	1.484	0.31
Spray program	6	12.722	1.27e-05	***
Time	6	40.538	1.69e-09	***
Season × Spray program	6	1.282	0.314
Season × Time	6	17.759	1.14e-06	***
Spray program × Time	36	6.164	9.31e-14	***
Season × Spray program × Time	36	1.024	0.447
C. Area under the disease progress curve (AUDPC)
Season	1	1.748	0.194
Spray program	6	5.712	0.000246	***
Season × Spray program	6	0.675	0.67
The experiments were carried out in the field at UGA Griffin campus, Griffin, GA in the summer and fall season of 2022
